# Supplementary material for: Production and cryopreservation of definitive endoderm from human pluripotent stem cells under defined and scalable culture conditions
Source: Springer Nature journal article supplement (doi:10.1038/s41596-020-00470-5), 2021-02-12
Supplement: MOESM1 [file 41596_2020_470_MOESM1_ESM12.xlsx]

## Sheet: Viability
Viability of Two Cell Lines in Erlenmeyer Flask at Day 3					Viability of Both Conditions in Bioreactor at Day 3
Percent Viability					Percent Viability
93.4					93.85
93.1					80.15
93.1					91.4
94.4					95.15
93.95					95.2
92.8					76.15
92.85					93.75
92.9					95.95
97.15
96.6
95.95
94.9
94.5
95.35
94.45
94.45
93.55
95.7
87.65
96.9
*Viability assessed by Beckman Coulter Vi-CELL XR

## Sheet: Thaw Viability
Viability of Thawed Cells in Erlenmeyer Flask					Viability of Thawed Cells from Bioreactor
Percent Viability					Percent Viability
89.75					84.65
90.6					91.55
87.1					90.7
91.5
91.35
92.95
90
89.1
94.225
93.45
93.65
*Viability assessed by Beckman Coulter Vi-CELL XR
